# Supplementary material
Source: PubMed Central journal article supplement (PMC2906587)
Supplement: 1003604107_pnas.1003604107_SI.pdf [file 1003604107_pnas.1003604107_SI.pdf]

# Supporting Information

Lorenz et al. 10.1073/pnas.1003604107

## SI Text

**Overlay of Myosin II (Postrigor, 2MYS) on Myosin V (Rigor, Chain A of 1W8J).** Overlays were calculated from  $C_{\alpha}$  atoms in the residue ranges given below using the program u3best (1).

**1. Overlay of lower 50-K domains of 2MYS on 1W8J.** Ranges for overlay:

| 2MYS    | Myosin V |
|---------|----------|
| 525–566 | 498–539  |
| 652–690 | 639–677  |
| 474–485 | 448–459  |
| 579–599 | 548–568  |

rmsd on 114  $C_{\alpha}$  atoms: 0.707 Å. The lower 50-K domains from myosin V and 2MYS are very similar.

Definition of lower 50-K domain for 2MYS:

|         |
|---------|
| 465–487 |
| 517–567 |
| 577–600 |
| 647–667 |

**2. Overlay of upper 50-K domains of 2MYS and 1W8J.** 2MYS was rotated so as to bring the lower 50-K domains into coincidence. Then the overlay necessary to bring the upper 50-K domains into coincidence was calculated.

Ranges for overlay:

| 2MYS    | Myosin 5 |
|---------|----------|
| 420–449 | 394–423  |
| 234–245 | 208–219  |
| 328–363 | 302–337  |
| 382–401 | 356–375  |
| 605–613 | 574–582  |
| 618–622 | 588–592  |

rmsd on 112  $C_{\alpha}$  atoms: 1.012 Å.

The overlay is achieved by rotating the upper 50-K domain of 2MYS through an angle of 22° about the axis depicted in Fig. S2. This axis lies along the  $\beta$ -sheet roughly at right angles to the actin helix axis. Note that the end strands (6th and 7th) of the  $\beta$ -sheet are twisted too much by this procedure.

Definition of upper 50-K domain for 2MYS:

|         |
|---------|
| 218–465 |
| 601–625 |

**3. Overlay of N-C-terminal domains for 1W8J and 2MYS.** As above, 2MYS was rotated so as to bring the lower 50-K domains into coincidence. Then the overlay necessary to bring the N-C-terminal domains into coincidence was calculated.

Ranges for overlay:

| 2MYS    | Myosin V |
|---------|----------|
| 698–708 | 685–695  |
| 132–172 | 116–156  |
| 186–197 | 170–181  |

rmsd on 64  $C_{\alpha}$  atoms: 1.164 Å.

The overlay is achieved by rotating the upper 50-K domain through an angle of 8.1° about the axis depicted in Fig. S3. This axis lies along the  $\beta$ -sheet roughly at right angles to the actin helix axis.

Definition of N-C-terminal domain for 2MYS:

|             |                          |
|-------------|--------------------------|
| 4–199       |                          |
| 488–516     |                          |
| 668–843     |                          |
| 859–1,008   | (Regulatory light chain) |
| 1,016–1,160 | (Essential light chain)  |

The converter domain carries the long lever arm of myosin bearing the light chains. The orientation of the converter domain achieved by the process outlined above leads to a positioning of the lever arm that is in excellent agreement with the EM density map.

The structure data generated by imposing these two rotations on the myosin II coordinates (referred to as myo2-5) were used as the starting coordinates for the MD run.

1. Kabsch W (1976) A solution for the best rotation to relate two sets of vectors. *Acta Crystallogr A* 32:922–923.

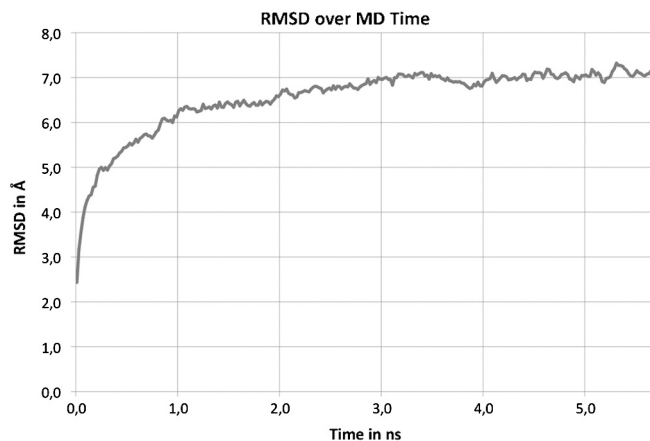

**Fig. S1.** Backbone rmsd of the final structure compared with the start structure of the actin-S1 complex. Convergence is already achieved after about 2 ns where the actin binding cleft in S1 has closed.

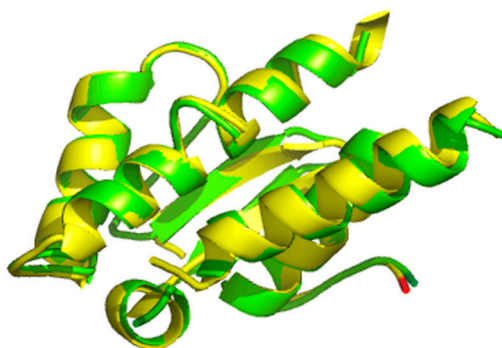

**Fig. S2.** Secondary structure cartoons showing the precise overlay that can be achieved between the lower 50-K domains of myosin II (2MYS, magenta) and myosin V (light green—chain A of 1W8J). Orientation as in Fig. 3. Generated with PyMol (1).

1. DeLano WL, Lam JW (2005) PyMOL: A communications tool for computational models. *Abstr Pap Am Chem S.* 230:254–COMP.

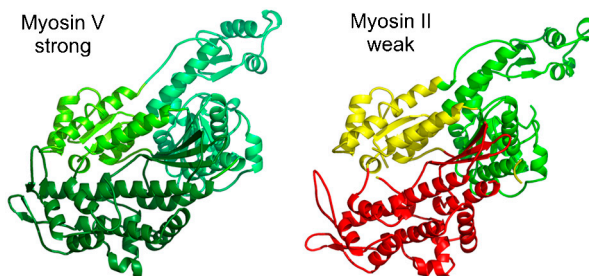

**Fig. S3.** The domain structure of the myosin head shown as secondary structure cartoons: Myosin 5 (strong binding form) lower 50-K domain—light green, upper 50-K domain—dark green, N-C-terminal domain—apple green (for clarity the N-terminal 60 residues are not shown). Myosin 2 (weak binding form) lower 50-K domain—yellow, upper 50-K domain—red, N-C-terminal domain—green (the N-terminal 70 residues are not shown). Orientation as in Fig. 2. Generated with PyMol (1).

1. DeLano WL, Lam JW (2005) PyMOL: A communications tool for computational models. *Abstr Pap Am Chem S.* 230:254–COMP.

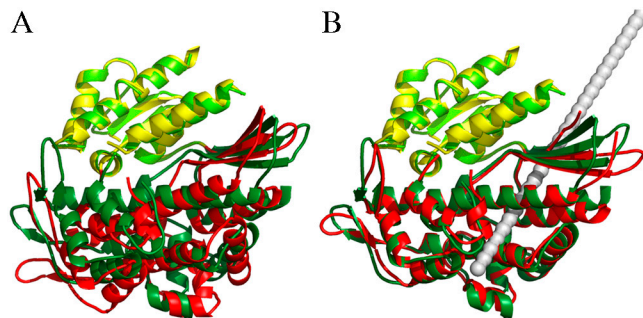

**Fig. 54.** (A) Overlay of the lower 50-K domains (myosin II in magenta, myosin V in light green), upper 50-K domains in red for myosin II, and dark green for myosin V. (B) A 22° rotation of the myosin II upper 50-K domain brings it into coincidence with the myosin V upper 50-K domain. The rotation axis is shown (gray). This is approximately at right angles to the actin helix axis and lies roughly in the plane of the  $\beta$ -sheet. (orientation as in Fig S1). Generated with PyMol (1).

1. DeLano WL, Lam JW (2005) PyMOL: A communications tool for computational models. *Abstr Pap Am Chem S.* 230:254–COMP.

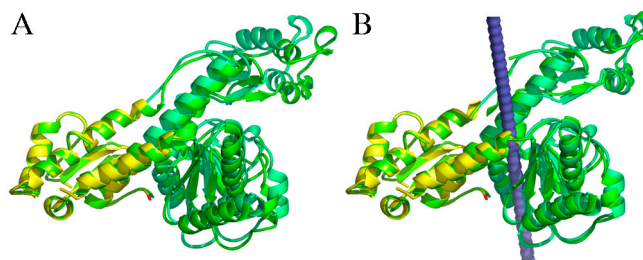

**Fig. 55.** (A) Overlay of the N-C-terminal domains of myosin II (yellow) and myosin V (apple green). Lower 50-K domains colored as in Fig. 4. (B) Applying an 8.1° rotation around the shown axis results in an almost perfect overlay of the N-C-terminal domains. The rotation axis—shown in blue—runs roughly along strand 3 of the  $\beta$ -sheet. Generated with PyMol (1).

1. DeLano WL, Lam JW (2005) PyMOL: A communications tool for computational models. *Abstr Pap Am Chem S.* 230:254–COMP.

**Table S1. Harmonic constraints for the three runs in molecular dynamics flexible fitting using myo2-5 as a starting model**

| Segment | Model 1     |              | Model 2  |              | Model 3  |              |     |     |     |
|---------|-------------|--------------|----------|--------------|----------|--------------|-----|-----|-----|
|         | Sequence    | Harm. const. | Sequence | Harm. const. | Sequence | Harm. const. |     |     |     |
| Actin   | 7-18        | 5.0          | 7-18     | 5.0          | 7-18     | 5.0          |     |     |     |
|         | 30-37       |              |          |              |          |              |     |     |     |
|         | 52-90       |              |          |              |          |              |     |     |     |
|         | 101-142     |              |          |              |          |              |     |     |     |
|         | 150-240     |              |          |              |          |              |     |     |     |
|         | 247-267     |              |          |              |          |              |     |     |     |
|         | 274-322     |              |          |              |          |              |     |     |     |
|         | 327-329     |              |          |              |          |              |     |     |     |
|         | 336-346     |              |          |              |          |              |     |     |     |
|         | 352-375     |              |          |              |          |              |     |     |     |
|         | ADP (actin) |              | All      |              | All      |              | All | All | 5.0 |
|         | S1          |              | 37-42    |              | 1.0      |              |     | 3.0 |     |
| 47-53   |             |              |          |              |          |              |     |     |     |
| 59-64   |             |              |          |              |          |              |     |     |     |
| 115-119 |             |              |          |              |          |              |     |     |     |
| 123-127 |             |              |          |              |          |              |     |     |     |
| 244-254 |             |              |          |              |          |              |     |     |     |
| 262-269 |             |              |          |              |          |              |     |     |     |
| 278-284 |             |              |          |              |          |              |     |     |     |
| 382-390 |             |              |          |              |          |              |     |     |     |
| 419-452 |             |              |          |              |          |              |     |     |     |
| 475-505 |             |              |          |              |          |              |     |     |     |
| 689-698 |             |              |          |              |          |              |     |     |     |
| 178-188 |             | 7.0          |          |              |          |              |     |     |     |
| 233-244 |             |              |          |              |          |              |     |     |     |
| 278-284 |             | 5.0          |          |              |          |              |     |     |     |
| 475-506 | 5.0         |              |          |              |          |              |     |     |     |
| 718-769 |             |              | 475-506  | 5.0          | 475-506  | 5.0          |     |     |     |
| 795-843 |             | 795-843      |          | 795-843      |          |              |     |     |     |
| ELC/RLC | All         | 5.0          | All      | 5.0          | All      | 5.0          |     |     |     |
